# Supplementary material for: Efficacy of Kan Jang® in Patients with Mild COVID-19: Interim Analysis of a Randomized, Quadruple-Blind, Placebo-Controlled Trial
Source: Pharmaceuticals (Basel). 2022 Aug 17;15(8):1013. doi: 10.3390/ph15081013 (PMC9415141; doi:10.3390/ph15081013)
Supplement: Supplementary file 1 [file pharmaceuticals-15-01013-s001.zip]

Archive with 5 entries (5 files):
- Supplement S1 KJ Dataset.xlsx
- Supplement S2.pdf
- Supplement S3 CONSORT-checklist.pdf
- Supplement S4 CRF-Kan Jang in COVID-19 and ammendment 2022-05-06.pdf
- Supplement S5 CoA - Kan Jang andrographis batch 3400195.pdf
