# Supplementary material for: Efficacy of Kan Jang® in Patients with Mild COVID-19: Interim Analysis of a Randomized, Quadruple-Blind, Placebo-Controlled Trial
Source: Pharmaceuticals (Basel). 2022 Aug 17;15(8):1013. doi: 10.3390/ph15081013 (PMC9415141; doi:10.3390/ph15081013)
Supplement: Supplementary file 1 [file pharmaceuticals-15-01013-s001.zip › Supplement S1 KJ Dataset.xlsx]

## Sheet: Total Data Set all in one
					Day 1	Day 7	Day 14	Day 21	event	Kaplan			Day 1	Day 3	Day 5	Day 7	Day 9	Day 11	Day 14	Day 17	Day 21	event	Kaplan			Day 1	Day 3	Day 5	Day 7	Day 9	Day 11	Day 14	Day 21													Day 1	Day 3	Day 5	Day 7
	Dropout Date	Group	Code		Visit 1	Visit 2	Visit 3	Visit 4			Code		Visit 1			Visit 2			Visit 3		Visit 4			Code		Visit 1			Visit 2			Visit 3	Visit 4									event	Kaplan	Code		Visit 1			Visit 2
1		A	1	COVID-19 PCR test	1	1	1	0	21	0	1	Body temperature	37.4	37.7	38	38	37.4	36.6	36.6	36.4	36.4	11	1	1	Fatigue	1	2	2	2	1	1	1	0	0	1	1	1	0	0	0	-1	21	1	1	Headache	1	2	2	1
2	2021-06-20	A	2	COVID-19 PCR test	1	0	0	NA	7	0	2	Body temperature	37.1	37.2	37.3	37	36.7	36.3	36.3	NA	NA	9	0	2	Fatigue	2	2	2	1	1	1	1	NA	0	0	0	-1	-1	-1	-1	#VALUE!	21	0	2	Headache	1	1	1	1
3		A	3	COVID-19 PCR test	1	1	1	0	21	0	3	Body temperature	37.2	37.3	37.1	37	36.6	37	36.8	36.6	36.4	9	1	3	Fatigue	1	2	2	2	1	1	1	0	0	1	1	1	0	0	0	-1	21	1	3	Headache	1	1	1	2
4		A	4	COVID-19 PCR test	1	1	0	0	14	0	4	Body temperature	37.5	37.9	37.7	37.9	37.5	37	36.4	36.6	36.6	14	1	4	Fatigue	2	2	2	2	1	1	0	0	0	0	0	0	-1	-1	-2	-2	14	1	4	Headache	2	2	2	2
5		B	5	COVID-19 PCR test	1	1	0	0	14	0	5	Body temperature	37.2	36.8	37.1	36.6	36.6	36.6	36.7	36.4	36.4	7	1	5	Fatigue	1	1	1	1	1	0	0	0	0	0	0	0	0	-1	-1	-1	9	1	5	Headache	0	0	0	0
6	2021-06-10	A	6	COVID-19 PCR test	1	NA	NA	NA	7	0	6	Body temperature	37	NA	NA	NA	NA	NA	NA	NA	NA	3	0	6	Fatigue	1	NA	NA	NA	NA	NA	NA	NA	0	#VALUE!	#VALUE!	#VALUE!	#VALUE!	#VALUE!	#VALUE!	#VALUE!	3	0	6	Headache	1	NA	NA	NA
7		B	7	COVID-19 PCR test	1	1	1	NA	21	0	7	Body temperature	38	38.5	37.8	37	36.6	36.4	36.6	36.7	36.6	9	1	7	Fatigue	1	2	2	2	1	1	0	0	0	1	1	1	0	0	-1	-1	14	1	7	Headache	1	2	1	1
8	2021-06-16	B	8	COVID-19 PCR test	1	1	NA	NA	14	2	8	Body temperature	37	37.5	38.5	38.6	NA	NA	NA	NA	NA	9	0	8	Fatigue	1	2	2	3	NA	NA	NA	NA	0	1	1	2	#VALUE!	#VALUE!	#VALUE!	#VALUE!	9	0	8	Headache	1	2	2	3
9	2021-06-17	B	9	COVID-19 PCR test	1	1	NA	NA	14	2	9	Body temperature	38	38.5	38.4	39	NA	NA	NA	NA	NA	9	0	9	Fatigue	2	2	2	3	NA	NA	NA	NA	0	0	0	1	#VALUE!	#VALUE!	#VALUE!	#VALUE!	9	0	9	Headache	2	2	2	3
10	2021-06-16	B	10	COVID-19 PCR test	1	NA	NA	NA	7	2	10	Body temperature	38	38.5	39	NA	NA	NA	NA	NA	NA	7	0	10	Fatigue	2	2	3	NA	NA	NA	NA	NA	0	0	1	#VALUE!	#VALUE!	#VALUE!	#VALUE!	#VALUE!	7	0	10	Headache	0	0	0	NA
11	2021-06-18	B	11	COVID-19 PCR test	1	1	NA	NA	14	2	11	Body temperature	37.5	38	38.5	38.5	NA	NA	NA	NA	NA	9	0	11	Fatigue	2	2	2	3	NA	NA	NA	NA	0	0	0	1	#VALUE!	#VALUE!	#VALUE!	#VALUE!	9	0	11	Headache	0	0	0	0
12		B	12	COVID-19 PCR test	1	1	1	0	21	0	12	Body temperature	37.4	36.6	36.7	36.4	36.4	36.4	36.6	36.6	36.6	3	1	12	Fatigue	1	1	1	1	0	0	0	0	0	0	0	0	-1	-1	-1	-1	9	1	12	Headache	1	1	1	1
13		A	13	COVID-19 PCR test	1	1	0	NA	14	0	13	Body temperature	37.3	37.1	36.6	36.6	36.6	36.4	36.6	36.6	36.6	5	1	13	Fatigue	1	1	1	1	0	0	0	0	0	0	0	0	-1	-1	-1	-1	9	1	13	Headache	1	1	1	1
14	2021-06-22	B	14	COVID-19 PCR test	1	1	NA	NA	14	2	14	Body temperature	37.7	38.5	38	38.8	NA	NA	NA	NA	NA	9	0	14	Fatigue	2	2	2	3	NA	NA	NA	NA	0	0	0	1	#VALUE!	#VALUE!	#VALUE!	#VALUE!	9	0	14	Headache	0	0	0	0
15	2021-06-22	B	15	COVID-19 PCR test	1	1	NA	NA	14	2	15	Body temperature	39	38.8	38.5	38.8	NA	NA	NA	NA	NA	9	0	15	Fatigue	2	3	3	3	NA	NA	NA	NA	0	1	1	1	#VALUE!	#VALUE!	#VALUE!	#VALUE!	9	0	15	Headache	2	3	3	3
16		B	16	COVID-19 PCR test	1	1	0	0	14	0	16	Body temperature	36.9	36.6	36.7	36.4	36.6	36.6	36.6	36.6	36.6	1	1	16	Fatigue	1	1	1	1	0	0	0	0	0	0	0	0	-1	-1	-1	-1	9	1	16	Headache	1	1	1	1
17		B	17	COVID-19 PCR test	1	1	1	NA	21	0	17	Body temperature	37.5	38	37.7	37.5	36.6	36.6	36.4	36.4	36.6	9	1	17	Fatigue	2	2	2	2	1	1	0	0	0	0	0	0	-1	-1	-2	-2	14	1	17	Headache	2	2	2	2
18		B	18	COVID-19 PCR test	1	1	0	NA	14	0	18	Body temperature	37.2	37	36.6	36.6	36.4	36.4	36.6	36.6	36.6	5	1	18	Fatigue	1	1	1	1	0	0	0	0	0	0	0	0	-1	-1	-1	-1	9	1	18	Headache	0	0	0	0
19		B	19	COVID-19 PCR test	1	1	1	NA	21	0	19	Body temperature	37.2	38	38	37.4	36.4	36.6	36.4	36.5	36.6	9	1	19	Fatigue	2	2	2	2	1	1	0	0	0	0	0	0	-1	-1	-2	-2	14	1	19	Headache	0	0	0	0
20		A	20	COVID-19 PCR test	1	1	0	NA	14	0	20	Body temperature	37.3	37.4	37.5	36.4	36.6	36.6	36.4	36.8	36.4	7	1	20	Fatigue	1	2	2	1	1	1	1	0	0	1	1	0	0	0	0	-1	21	1	20	Headache	0	0	0	0
21	2021-07-13	A	21	COVID-19 PCR test	1	1	NA	NA	14	2	21	Body temperature	37.3	37.2	38	38.5	NA	NA	NA	NA	NA	9	0	21	Fatigue	1	2	2	3	NA	NA	NA	NA	0	1	1	2	#VALUE!	#VALUE!	#VALUE!	#VALUE!	9	0	21	Headache	1	2	2	2
22		A	22	COVID-19 PCR test	1	1	0	NA	14	0	22	Body temperature	37.7	37.5	37.4	37.4	37	36.8	36.6	36.6	36.6	11	1	22	Fatigue	2	2	2	1	1	1	1	0	0	0	0	-1	-1	-1	-1	-2	21	1	22	Headache	2	2	2	1
23		A	23	COVID-19 PCR test	1	1	1	NA	21	0	23	Body temperature	38	37.5	37.4	36.5	36.6	36.4	36.5	36.7	36.4	7	1	23	Fatigue	2	2	2	2	1	1	1	0	0	0	0	0	-1	-1	-1	-2	21	1	23	Headache	0	0	0	0
24		B	24	COVID-19 PCR test	1	1	0	NA	14	0	24	Body temperature	38	37.7	37.4	37	36.8	36.5	36.6	36.7	36.8	9	1	24	Fatigue	2	2	2	1	1	1	1	0	0	0	0	-1	-1	-1	-1	-2	21	1	24	Headache	2	2	2	1
25	2021-08-25	B	25	COVID-19 PCR test	1	1	NA	NA	14	0	25	Body temperature	38.5	37.8	37.7	37.4	NA	NA	NA	NA	NA	7	0	25	Fatigue	2	2	2	2	NA	NA	NA	NA	0	0	0	0	#VALUE!	#VALUE!	#VALUE!	#VALUE!	9	0	25	Headache	2	2	2	2
26		B	26	COVID-19 PCR test	1	1	0	NA	14	0	26	Body temperature	37.5	37.4	37.3	36.8	36.9	36.4	36.6	36.7	36.8	7	1	26	Fatigue	1	2	2	1	1	1	1	0	0	1	1	0	0	0	0	-1	21	1	26	Headache	2	2	2	2
27	2021-09-14	A	27	COVID-19 PCR test	1	1	NA	NA	14	2	27	Body temperature	38.5	37.5	37.7	37.9	NA	NA	NA	NA	NA	9	0	27	Fatigue	2	2	2	3	NA	NA	NA	NA	0	0	0	1	#VALUE!	#VALUE!	#VALUE!	#VALUE!	9	0	27	Headache	0	0	0	0
28		A	28	COVID-19 PCR test	1	0	NA	NA	7	0	28	Body temperature	38	37.5	37.1	36.4	36.5	36.6	36.7	36.6	36.6	7	1	28	Fatigue	2	2	2	2	1	1	0	0	0	0	0	0	-1	-1	-2	-2	14	1	28	Headache	2	2	2	1
29	2021-10-12	A	29	COVID-19 PCR test	1	1	NA	NA	14	0	29	Body temperature	37.8	37.6	37.4	37	NA	NA	NA	NA	NA	9	0	29	Fatigue	2	2	2	1	NA	NA	NA	NA	0	0	0	-1	#VALUE!	#VALUE!	#VALUE!	#VALUE!	9	0	29	Headache	2	2	2	1
30		B	30	COVID-19 PCR test	1	1	0	NA	14	0	30	Body temperature	37.8	37.6	37.4	37.2	37	36	36.4	36.2	36.3	11	1	30	Fatigue	2	2	2	2	1	1	1	0	0	0	0	0	-1	-1	-1	-2	21	1	30	Headache	0	0	0	0
31		B	31	COVID-19 PCR test	1	1	1	NA	21	0	31	Body temperature	37.5	37	36.5	36.4	36.3	36	36.2	36.3	36.4	5	1	31	Fatigue	2	2	2	2	0	0	0	0	0	0	0	0	-2	-2	-2	-2	9	1	31	Headache	2	2	2	2
32	2021-10-18	B	32	COVID-19 PCR test	1	1	NA	NA	14	0	32	Body temperature	37.3	37.2	37	36.4	36.6	36.7	NA	NA	NA	7	0	32	Fatigue	2	2	2	1	1	0	NA	NA	0	0	0	-1	-1	-2	#VALUE!	#VALUE!	14	1	32	Headache	2	2	2	1
33		B	33	COVID-19 PCR test	1	1	1	NA	21	0	33	Body temperature	38	37.5	37.4	36.5	36.4	36.7	36.4	36.3	36.4	7	1	33	Fatigue	2	2	2	1	1	1	1	0	0	0	0	-1	-1	-1	-1	-2	14	1	33	Headache	2	2	1	1
34		B	34	COVID-19 PCR test	1	1	0	NA	14	0	34	Body temperature	37.4	37.5	37.2	37	36.6	36.4	36.3	36.3	36.4	9	1	34	Fatigue	3	3	2	2	1	1	1	1	0	0	-1	-1	-2	-2	-2	-2	22	1	34	Headache	3	3	2	2
35	2021-10-19	B	35	COVID-19 PCR test	1	NA	NA	NA	7	0	35	Body temperature	37.8	NA	NA	NA	NA	NA	NA	NA	NA	3	0	35	Fatigue	2	NA	NA	NA	NA	NA	NA	NA	0	#VALUE!	#VALUE!	#VALUE!	#VALUE!	#VALUE!	#VALUE!	#VALUE!	3	0	35	Headache	2	NA	NA	NA
36		A	36	COVID-19 PCR test	1	1	0	NA	14	0	36	Body temperature	37.7	37.6	37	36.4	36.6	36.6	36.6	36.6	36.6	7	1	36	Fatigue	2	2	2	2	1	1	1	0	0	0	0	0	-1	-1	-1	-2	21	1	36	Headache	2	2	2	1
37		B	37	COVID-19 PCR test	1	1	1	NA	21	0	37	Body temperature	38.5	38	37.5	36.4	36.6	36.4	36.6	36.6	36.6	7	1	37	Fatigue	2	2	2	1	1	1	1	0	0	0	0	-1	-1	-1	-1	-2	21	1	37	Headache	2	2	2	1
38		A	38	COVID-19 PCR test	1	1	1	NA	21	0	38	Body temperature	37.8	38	37.6	37.4	36.4	36.8	36.4	36.2	36.4	9	1	38	Fatigue	2	2	1	1	1	1	1	0	0	0	-1	-1	-1	-1	-1	-2	21	1	38	Headache	2	2	1	1
39		A	39	COVID-19 PCR test	1	1	1	NA	21	0	39	Body temperature	38	37.8	37.1	36.4	36.7	36.4	36.4	36.4	36.6	7	1	39	Fatigue	2	2	2	1	1	1	1	0	0	0	0	-1	-1	-1	-1	-2	21	1	39	Headache	2	2	2	1
40	2021-10-29	A	40	COVID-19 PCR test	1	1	NA	NA	14	2	40	Body temperature	37.7	38	38.5	38	NA	NA	NA	NA	NA	9	0	40	Fatigue	2	2	2	3	NA	NA	NA	NA	0	0	0	1	#VALUE!	#VALUE!	#VALUE!	#VALUE!	9	0	40	Headache	2	2	2	3
41	2021-10-29	B	41	COVID-19 PCR test	1	NA	NA	NA	7	0	41	Body temperature	38	37.8	NA	NA	NA	NA	NA	NA	NA	5	0	41	Fatigue	2	2	NA	NA	NA	NA	NA	NA	0	0	#VALUE!	#VALUE!	#VALUE!	#VALUE!	#VALUE!	#VALUE!	5	0	41	Headache	2	2	NA	NA
42		B	42	COVID-19 PCR test	1	1	0	NA	14	0	42	Body temperature	37.8	37.5	37.6	37.8	36.5	36.8	36.8	36.6	36.6	9	1	42	Fatigue	2	2	2	2	2	2	1	0	0	0	0	0	0	0	-1	-2	21	1	42	Headache	2	2	2	2
43		B	43	COVID-19 PCR test	1	1	1	NA	21	0	43	Body temperature	37.8	37.6	37.4	37.4	36.8	36.6	36.4	36.4	36.5	9	1	43	Fatigue	2	2	1	1	1	1	0	0	0	0	-1	-1	-1	-1	-2	-2	14	1	43	Headache	2	2	1	1
44	2021-11-21	B	44	COVID-19 PCR test	1	1	NA	NA	14	0	44	Body temperature	37.6	37.7	37.4	36.4	36.5	36.6	NA	NA	NA	7	0	44	Fatigue	2	2	1	2	1	1	NA	NA	0	0	-1	0	-1	-1	#VALUE!	#VALUE!	14	0	44	Headache	2	2	1	1
45		B	45	COVID-19 PCR test	1	1	0	NA	14	0	45	Body temperature	37.5	37.4	37.2	37	36.8	36.9	36.4	36	36.4	9	1	45	Fatigue	2	2	1	1	0	0	0	0	0	0	-1	-1	-2	-2	-2	-2	9	1	45	Headache	2	2	1	1
46		B	46	COVID-19 PCR test	1	1	0	NA	14	0	46	Body temperature	37.8	38	37.2	36.8	36.9	37	36.5	36.4	36.6	7	1	46	Fatigue	2	2	2	1	0	0	0	0	0	0	0	-1	-2	-2	-2	-2	9	1	46	Headache	2	2	2	1
47		A	47	COVID-19 PCR test	1	1	0	NA	14	0	47	Body temperature	37.8	37.5	36.8	36.5	36.6	36.9	36.6	36.6	36.4	5	1	47	Fatigue	2	2	2	1	1	1	1	0	0	0	0	-1	-1	-1	-1	-2	21	1	47	Headache	2	2	2	1
48		B	48	COVID-19 PCR test	1	1	0	NA	14	0	48	Body temperature	37.5	37.3	37.6	37.1	36.6	36.6	36.7	36.4	36.6	9	1	48	Fatigue	2	2	2	1	0	0	0	0	0	0	0	-1	-2	-2	-2	-2	9	1	48	Headache	2	2	2	1
49		B	49	COVID-19 PCR test	1	1	0	NA	14	0	49	Body temperature	37.8	37.5	37.2	36.4	36.6	36.2	36.4	36.2	36.1	7	1	49	Fatigue	2	2	1	1	0	0	0	0	0	0	-1	-1	-2	-2	-2	-2	9	1	49	Headache	2	2	1	1
50	2021-12-15	B	50	COVID-19 PCR test	1	1	NA	NA	14	0	50	Body temperature	38	37.8	37.2	36.5	36.6	36.6	NA	NA	NA	7	0	50	Fatigue	2	2	2	1	0	0	NA	NA	0	0	0	-1	-2	-2	#VALUE!	#VALUE!	9	1	50	Headache	2	2	2	1
51	2021-12-05	B	51	COVID-19 PCR test	1	NA	NA	NA	7	2	51	Body temperature	38	39	NA	NA	NA	NA	NA	NA	NA	5	0	51	Fatigue	3	3	NA	NA	NA	NA	NA	NA	0	0	#VALUE!	#VALUE!	#VALUE!	#VALUE!	#VALUE!	#VALUE!	5	0	51	Headache	0	0	NA	NA
52	2021-12-05	B	52	COVID-19 PCR test	1	NA	NA	NA	7	2	52	Body temperature	38	38.5	NA	NA	NA	NA	NA	NA	NA	5	0	52	Fatigue	3	3	NA	NA	NA	NA	NA	NA	0	0	#VALUE!	#VALUE!	#VALUE!	#VALUE!	#VALUE!	#VALUE!	5	0	52	Headache	0	0	NA	NA
53	2021-12-05	B	53	COVID-19 PCR test	1	NA	NA	NA	7	2	53	Body temperature	38.2	38.8	NA	NA	NA	NA	NA	NA	NA	5	0	53	Fatigue	2	3	NA	NA	NA	NA	NA	NA	0	1	#VALUE!	#VALUE!	#VALUE!	#VALUE!	#VALUE!	#VALUE!	5	0	53	Headache	2	3	NA	NA
54	2021-12-05	B	54	COVID-19 PCR test	1	NA	NA	NA	7	2	54	Body temperature	38	38.5	NA	NA	NA	NA	NA	NA	NA	5	0	54	Fatigue	2	3	NA	NA	NA	NA	NA	NA	0	1	#VALUE!	#VALUE!	#VALUE!	#VALUE!	#VALUE!	#VALUE!	5	0	54	Headache	2	3	NA	NA
55		B	55	COVID-19 PCR test	1	1	1	NA	21	0	55	Body temperature	37.5	37	36.8	36.4	36.2	36.6	36.6	36.5	36.6	5	1	55	Fatigue	2	2	2	1	0	0	0	0	0	0	0	-1	-2	-2	-2	-2	9	1	55	Headache	2	2	2	1
56	2021-12-16	A	56	COVID-19 PCR test	1	1	NA	NA	14	0	56	Body temperature	37.5	37.7	37.2	36.5	36.6	36.5	NA	NA	NA	7	0	56	Fatigue	2	2	1	1	1	0	NA	NA	0	0	-1	-1	-1	-2	#VALUE!	#VALUE!	14	0	56	Headache	2	2	1	1
57	2021-12-16	B	57	COVID-19 PCR test	1	1	NA	NA	14	0	57	Body temperature	37.2	37.1	37	36.6	36.5	36.5	NA	NA	NA	7	0	57	Fatigue	1	1	1	1	0	0	NA	NA	0	0	0	0	-1	-1	#VALUE!	#VALUE!	9	1	57	Headache	0	0	0	0
58		A	58	COVID-19 PCR test	1	1	0	NA	14	0	58	Body temperature	38	37.8	37.5	37.2	36.8	36.6	36.4	36.4	36.5	9	1	58	Fatigue	2	2	2	1	1	1	1	0	0	0	0	-1	-1	-1	-1	-2	21	1	58	Headache	2	2	1	0
59		A	59	COVID-19 PCR test	1	1	1	NA	21	0	59	Body temperature	37.2	37	37.1	36.5	36.6	36.4	36.4	36.5	36.4	7	1	59	Fatigue	2	2	2	1	1	1	1	0	0	0	0	-1	-1	-1	-1	-2	21	1	59	Headache	2	2	1	1
60		B	60	COVID-19 PCR test	1	1	0	NA	14	0	60	Body temperature	37.3	37.2	37.1	36.8	36.6	36.5	36.4	36.4	36.6	7	1	60	Fatigue	2	2	1	1	1	0	1	0	0	0	-1	-1	-1	-2	-1	-2	21	1	60	Headache	2	2	1	1
61		A	61	COVID-19 PCR test	1	1	0	NA	14	0	61	Body temperature	37.5	37.4	37.1	36.6	36.6	36.6	36.4	36.4	36.4	7	1	61	Fatigue	2	2	2	2	2	2	1	0	0	0	0	0	0	0	-1	-2	21	1	61	Headache	2	2	2	2
62		B	62	COVID-19 PCR test	1	1	0	NA	14	0	62	Body temperature	37.5	37.2	36.4	36.6	36.4	36.6	36.6	36.6	36.6	7	1	62	Fatigue	1	1	1	1	0	0	0	0	0	0	0	0	-1	-1	-1	-1	9	1	62	Headache	2	2	0	0
63		A	63	COVID-19 PCR test	1	1	0	NA	14	0	63	Body temperature	37	37.5	37.6	36.4	36.6	36.4	36.4	36.4	36.6	7	1	63	Fatigue	2	2	2	0	0	0	0	0	0	0	0	-2	-2	-2	-2	-2	7	1	63	Headache	2	2	2	0
64		B	64	COVID-19 PCR test	1	1	0	NA	14	0	64	Body temperature	37.5	37.6	37.2	36.6	36.4	36	36.2	36.4	36.6	7	1	64	Fatigue	2	1	1	1	1	0	0	0	0	-1	-1	-1	-1	-2	-2	-2	11	1	64	Headache	2	2	2	2
65	2022-01-06	B	65	COVID-19 PCR test	1	1	NA	NA	14	0	65	Body temperature	37.5	37.7	37.4	37.2	36.8	36.6				9	0	65	Fatigue	2	2	2	2	0	0			0	0	0	0	-2	-2	-2	-2	9	1	65	Headache	2	2	2	2
66		B	66	COVID-19 PCR test	1	0	NA	NA	7	0	66	Body temperature	37.2	37	36.6	36.4	36.6	36.6	36.5	36.6	36.6	5	1	66	Fatigue	1	1	1	0	0	0	0	0	0	0	0	-1	-1	-1	-1	-1	7	1	66	Headache	1	1	1	0
67		B	67	COVID-19 PCR test	1	0	NA	NA	7	0	67	Body temperature	37.2	37.1	37	36.5	36.6	36.6	36.7	36.4	36.6	7	1	67	Fatigue	2	2	2	1	0	0	0	0	0	0	0	-1	-2	-2	-2	-2	9	1	67	Headache	2	2	2	2
68		B	68	COVID-19 PCR test	1	0	NA	NA	7	0	68	Body temperature	37.5	37	36.5	36.6	36.4	36.5	36.6	36.6	36.6	5	1	68	Fatigue	2	2	1	0	0	0	0	0	0	0	-1	-2	-2	-2	-2	-2	7	1	68	Headache	2	2	2	2
69		A	69	COVID-19 PCR test	1	0	NA	NA	7	0	69	Body temperature	38	38	37.8	37.5	36.5	36.6	36.4	36.5	36.6	9	1	69	Fatigue	2	2	2	0	0	0	0	0	0	0	0	-2	-2	-2	-2	-2	7	1	69	Headache	2	2	2	2
70		B	70	COVID-19 PCR test	1	0	NA	NA	7	0	70	Body temperature	37.5	37.3	37	36.5	36.6	36.5	36.6	36.6	36.4	7	1	70	Fatigue	1	1	0	0	0	0	0	0	0	0	-1	-1	-1	-1	-1	-1	5	1	70	Headache	1	1	0	0
71	2022-02-07	B	71	COVID-19 PCR test	1	0	NA	NA	7	0	71	Body temperature	37.1	37	36.4	36.6	NA	NA	NA	NA	NA	9	0	71	Fatigue	2	2	1	1	NA	NA	NA	NA	0	0	-1	-1	#VALUE!	#VALUE!	#VALUE!	#VALUE!	9	0	71	Headache	1	1	1	0
72	2022-02-07	B	72	COVID-19 PCR test	1	0	NA	NA	7	0	72	Body temperature	37	36.8	37.5	37	NA	NA	NA	NA	NA	9	0	72	Fatigue	2	2	2	2	NA	NA	NA	NA	0	0	0	0	#VALUE!	#VALUE!	#VALUE!	#VALUE!	9	0	72	Headache	2	2	2	1
73		A	73	COVID-19 PCR test	1	0	NA	NA	7	0	73	Body temperature	38.5	38	37.4	36.6	36.4	36.4	36.6	36.6	36.6	7	1	73	Fatigue	2	2	2	0	0	0	0	0	0	0	0	-2	-2	-2	-2	-2	7	1	73	Headache	2	2	0	0
74		A	74	COVID-19 PCR test	1	0	NA	NA	7	0	74	Body temperature	37.5	37	36.8	36.6	36.4	36.6	36.6	36.6	36.6	5	1	74	Fatigue	2	2	2	0	0	0	0	0	0	0	0	-2	-2	-2	-2	-2	7	1	74	Headache	2	1	1	0
75	2022-02-12	B	75	COVID-19 PCR test	1	0	NA	NA	7	0	75	Body temperature	37.2	37.3	36.6	36.6	NA	NA	NA	NA	NA	5	0	75	Fatigue	2	2	1	0	NA	NA	NA	NA	0	0	-1	-2	#VALUE!	#VALUE!	#VALUE!	#VALUE!	9	1	75	Headache	1	1	1	0
76		A	76	COVID-19 PCR test	1	0	NA	NA	7	0	76	Body temperature	38	38.5	37.5	36.5	36.4	36.6	36.4	36.6	36.6	7	1	76	Fatigue	2	2	1	0	0	0	0	0	0	0	-1	-2	-2	-2	-2	-2	7	1	76	Headache	2	2	1	0
77		A	77	COVID-19 PCR test	1	0	NA	NA	7	0	77	Body temperature	38	37.8	37.1	36.5	36.4	36.6	36.6	36.6	36.4	7	1	77	Fatigue	2	2	2	2	1	1	1	1	0	0	0	0	-1	-1	-1	-1	21	0	77	Headache	1	1	1	1
78		A	78	COVID-19 PCR test	1	0	NA	NA	7	0	78	Body temperature	37.2	37.1	36.8	36.7	36.6	36.4	36.3	36.4	36.6	5	1	78	Fatigue	1	1	1	1	1	1	0	0	0	0	0	0	0	0	-1	-1	14	1	78	Headache	1	1	1	1
79	2022-02-25	A	79	COVID-19 PCR test	1	NA	NA	NA	7	0	79	Body temperature	37.5	37.7	37	NA	NA	NA	NA	NA	NA	7	0	79	Fatigue	1	1	1	NA	NA	NA	NA	NA	0	0	0	#VALUE!	#VALUE!	#VALUE!	#VALUE!	#VALUE!	7	0	79	Headache	2	2	2	NA
80		A	80	COVID-19 PCR test	1	1	0	NA	14	0	80	Body temperature	37.7	37.2	37.5	36.9	36.8	36.6	36.4	36.4	36.6	7	1	80	Fatigue	2	2	2	2	0	0	0	0	0	0	0	0	-2	-2	-2	-2	9	1	80	Headache	2	2	2	2
81		B	81	COVID-19 PCR test	1	0	0	NA	7	0	81	Body temperature	37	37.3	37.2	37.3	37.4	36.8	36.6	36.6	36.6	11	1	81	Fatigue	1	1	1	1	1	1	1	1	0	0	0	0	0	0	0	0	22	1	81	Headache	1	1	1	0
82		B	82	COVID-19 PCR test	1	1	0	NA	14	0	82	Body temperature	37	37	37.2	37.1	36.5	36.6	36.6	36.6	36.6	9	1	82	Fatigue	1	1	1	1	1	1	1	0	0	0	0	0	0	0	0	-1	21	1	82	Headache	1	1	1	0
83		A	83	COVID-19 PCR test	1	1	0	NA	14	0	83	Body temperature	37.1	37.2	37.2	36.8	36.6	36.6	36.4	36.4	36.4	7	1	83	Fatigue	1	1	1	0	0	0	0	0	0	0	0	-1	-1	-1	-1	-1	7	1	83	Headache	1	0	1	0
84		A	84	COVID-19 PCR test	1	1	0	NA	14	0	84	Body temperature	37.2	37.3	37.1	37.1	36.8	36.8	36.7	36.7	36.7	9	1	84	Fatigue	1	1	1	1	0	0	0	0	0	0	0	0	-1	-1	-1	-1	9	1	84	Headache	1	1	1	1
85		B	85	COVID-19 PCR test	1	1	0	NA	14	0	85	Body temperature	37.1	37.1	37	36.5	36.6	36.6	36.4	36.6	36.6	7	1	85	Fatigue	1	1	1	1	1	1	1	1	0	0	0	0	0	0	0	0	22	0	85	Headache	1	1	1	1
86		A	86	COVID-19 PCR test	1	1	0	NA	14	0	86	Body temperature	37.5	37.1	37.2	36.5	36.6	36.6	36.6	36.6	36.6	7	1	86	Fatigue	1	1	1	2	2	1	0	0	0	0	0	1	1	0	-1	-1	14	1	86	Headache	2	2	2	2
		A	87	COVID-19 PCR test							87	Body temperature												87	Fatigue																			87	Headache
		B	88	COVID-19 PCR test							88	Body temperature												88	Fatigue																			88	Headache
		A	89	COVID-19 PCR test							89	Body temperature												89	Fatigue																			89	Headache
		A	90	COVID-19 PCR test							90	Body temperature												90	Fatigue																			90	Headache
		A	91	COVID-19 PCR test							91	Body temperature												91																				91
		B	92	COVID-19 PCR test							92	Body temperature												92																				92
		A	93	COVID-19 PCR test							93	Body temperature												93																				93
		A	94	COVID-19 PCR test							94	Body temperature												94																				94
		A	95	COVID-19 PCR test							95	Body temperature												95																				95
		B	96	COVID-19 PCR test							96	Body temperature												96																				96
		A	97	COVID-19 PCR test							97	Body temperature												97																				97
		A	98	COVID-19 PCR test							98	Body temperature												98																				98
		A	99	COVID-19 PCR test							99	Body temperature												99																				99
		A	100	COVID-19 PCR test							100	Body temperature												100																				100
		A	101	COVID-19 PCR test							101	Body temperature												101																				101
		A	102	COVID-19 PCR test							102	Body temperature												102																				102
		B	103	COVID-19 PCR test							103	Body temperature												103																				103
		A	104	COVID-19 PCR test							104	Body temperature												104																				104
		B	105	COVID-19 PCR test							105	Body temperature												105																				105
		B	106	COVID-19 PCR test							106	Body temperature												106																				106
		B	107	COVID-19 PCR test							107	Body temperature												107																				107
		B	108	COVID-19 PCR test							108	Body temperature												108																				108
		B	109	COVID-19 PCR test							109	Body temperature												109																				109
		B	110	COVID-19 PCR test							110	Body temperature												110																				110
		A	111	COVID-19 PCR test							111	Body temperature												111																				111
		B	112	COVID-19 PCR test							112	Body temperature												112																				112
		B	113	COVID-19 PCR test							113	Body temperature												113																				113
		A	114	COVID-19 PCR test							114	Body temperature												114																				114
		B	115	COVID-19 PCR test							115	Body temperature												115																				115
		A	116	COVID-19 PCR test							116	Body temperature												116																				116
		A	117	COVID-19 PCR test							117	Body temperature												117																				117
		B	118	COVID-19 PCR test							118	Body temperature												118																				118
		B	119	COVID-19 PCR test							119	Body temperature												119																				119
		B	120	COVID-19 PCR test							120	Body temperature												120																				120
		A	121	COVID-19 PCR test							121	Body temperature												121																				121
		B	122	COVID-19 PCR test							122	Body temperature												122																				122
		A	123	COVID-19 PCR test							123	Body temperature												123																				123
		A	124	COVID-19 PCR test							124	Body temperature												124																				124
		A	125	COVID-19 PCR test							125	Body temperature												125																				125
		B	126	COVID-19 PCR test							126	Body temperature												126																				126
		A	127	COVID-19 PCR test							127	Body temperature												127																				127
		A	128	COVID-19 PCR test							128	Body temperature												128																				128
		B	129	COVID-19 PCR test							129	Body temperature												129																				129
		A	130	COVID-19 PCR test							130	Body temperature												130																				130
		B	131	COVID-19 PCR test							131	Body temperature												131																				131
		A	132	COVID-19 PCR test							132	Body temperature												132																				132
		A	133	COVID-19 PCR test							133	Body temperature												133																				133
		A	134	COVID-19 PCR test							134	Body temperature												134																				134
		A	135	COVID-19 PCR test							135	Body temperature												135																				135
		A	136	COVID-19 PCR test							136	Body temperature												136																				136
		A	137	COVID-19 PCR test							137	Body temperature												137																				137
		A	138	COVID-19 PCR test							138	Body temperature												138																				138
		A	139	COVID-19 PCR test							139	Body temperature												139																				139
		A	140	COVID-19 PCR test							140	Body temperature												140																				140
		A	141
		A	142
		B	143
		B	144
		A	145
		B	146
		A	147
		A	148
		A	149
		A	150
		A	151
		A	152
		A	153
		A	154
		B	155
		B	156
		A	157
		B	158
		B	159
		B	160
			Kan Jng, n=27	7
			Placebo, n=32	14
			Ratio (and its reciprocal)	0.5	2
			95% CI of ratio	0.2996 to 0.8345	1.198 to 3.338
[truncated: 263 more columns]

## Sheet: Demographic 
																		Total	Dropout	Dropout at the end	all Dropouts	Steroids		Included in analysis			14% ARR absolute risk reduction
Trial related assignments			Demographic data							Day 1	Day 7	Day 14	Day 21				A	34	2	2	4	3		30	0.1		24% RRR	Relative risk reduction
Entry Number	Group	Code	Patient Name	Gender	Age	Height	Weight	BMI	Screening Date	Visit 1	Visit 2	Visit 3	Visit 4	Finish Date	Dropout Date	Reasons and Comments	B	52	2	9	11	10		41	0.244		Number Needed to Treat (NNT) is the number of patients you need to treat to prevent one additional bad outcome.
1	A	1	TI_ MC	F	49	173	70	23.3887	2021-05-26	2021-05-26	2021-06-01	2021-06-08	2021-06-15	2021-06-15
2	A	2	NI_BA	F	35	169	60	21.0077	2021-05-31	2021-05-31	2021-06-06	2021-06-13	dropout	dropout	2021-06-20	FOLLOW-UP REFUSE
3	A	3	NI_ GO	F	57	172	80	27.0416	2021-06-03	2021-06-03	2021-06-09	2021-06-16	2021-06-23	2021-06-23
4	A	4	MA_NE	F	49	167	65	23.3067	2021-06-03	2021-06-03	2021-06-09	2021-06-16	2021-06-23	2021-06-23
5	B	5	NI_DE	F	49	175	63	20.5714	2021-06-08	2021-06-08	2021-06-14	2021-06-21	2021-06-28	2021-06-28													NNTs are always rounded up to the nearest whole number and accompanied as standard by the 95% confidence interval .
6	A	6	NI_ TA	F	34	168	58	20.5499	2021-06-09	2021-06-09	dropout	dropout	dropout	dropout	2021-06-10	VOLUNTARY REFUSE
7	B	7	NA_ MI	F	24	163	50	18.8189	2021-06-09	2021-06-09	2021-06-15	2021-06-22	2021-06-29	2021-06-29						Power		Power					NNT = 7, if a drug reduces the risk of a bad outcome from 24% to 10%, the ARR = 0.24 - 0.10 = 0.14. Therefore, the NNT = 1/ARR = 7.14
8	B	8	NA_AB	F	69	165	62	22.7732	2021-06-10	2021-06-10	2021-06-16	dropout	dropout	dropout	2021-06-16	USING STEROIDS				0.878		0.7071
9	B	9	MA_ TI	M	45	170	80	27.6817	2021-06-11	2021-06-11	2021-06-17	dropout	dropout	dropout	2021-06-17	USING STEROIDS AND ANTIBIOTICS				p value		p value
10	B	10	NA_GO	F	33	177	65	20.7476	2021-06-11	2021-06-11	dropout	dropout	dropout	dropout	2021-06-16	USING STEROIDS				0.0137		0.0483
11	B	11	OL_KH	F	51	168	85	30.1162	2021-06-11	2021-06-11	2021-06-17	dropout	dropout	dropout	2021-06-18	USING STEROIDS AND ANTIBIOTICS	.
12	B	12	GO_MA	M		180	85	26.2346	2021-06-11	2021-06-11	2021-06-17	2021-06-24	2021-07-01	2021-07-01
13	A	13	NA_ AK	F	68	170	78	26.9896	2021-06-12	2021-06-12	2021-06-18	2021-06-25	2021-07-02	2021-07-02			p value
14	B	14	GI_GI	M	43	178	80	25.2493	2021-06-15	2021-06-15	2021-06-21	dropout	dropout	dropout	2021-06-22	USING STEROIDS
15	B	15	RE_KA	M	26	175	85	27.7551	2021-06-15	2021-06-15	2021-06-21	dropout	dropout	dropout	2021-06-22	USING STEROIDS
16	B	16	LE_JI	M	20	176	70	22.5981	2021-06-17	2021-06-17	2021-06-23	2021-06-30	2021-07-07	2021-07-07
17	B	17	ZU_VE	M	65	170	84	29.0657	2021-06-23	2021-06-23	2021-06-29	2021-07-06	2021-07-13	2021-07-13
18	B	18	JU_GI	M	32	170	59	20.4152	2021-06-23	2021-06-23	2021-06-29	2021-07-06	2021-07-13	2021-07-13
19	B	19	IN_GU	F	56	167	64	22.9481	2021-06-24	2021-06-24	2021-06-30	2021-07-07	2021-07-14	2021-07-14
20	A	20	VA_ TU	M	69	168	68	24.093	2021-06-30	2021-06-30	2021-07-06	2021-07-13	2021-07-20	2021-07-20
21	A	21	MA_GU	F	66	170	85	29.4118	2021-07-06	2021-07-06	2021-07-12	dropout	dropout	dropout	2021-07-13	USING STEROIDS
22	A	22	OT_KH	M	29	170	68	23.5294	2021-07-16	2021-07-16	2021-07-22	2021-07-29	2021-08-05	2021-08-05
23	A	23	MA_DA	M	26	184	84	24.811	2021-07-20	2021-07-20	2021-07-26	2021-08-02	2021-08-09	2021-08-09
24	B	24	SA_ BA	M	18	182	78	23.5479	2021-07-28	2021-07-28	2021-08-03	2021-08-10	2021-08-17	2021-08-17										Group B’s (placebo) conversion rate (24.4%) was 144% higher than Groupt A’s (Kan Jang) conversion rate (10.0%).
25	B	25	TA_PA	M	23	170	70	24.2215	2021-08-12	2021-08-12	2021-08-18	dropout	dropout	dropout	2021-08-25	SUBJECT LOST TO FOLLOW-UP								p<0.05
26	B	26	LE_BI	F	55	168	70	24.8016	2021-09-07	2021-09-07	2021-09-13	2021-09-20	2021-09-27	2021-09-27										Significant result! 90% significance level
27	A	27	NA_BI	F	81	160	80	31.25	2021-09-07	2021-09-07	2021-09-13	dropout	dropout	dropout	2021-09-14	USING STEROIDS AND ANTIBIOTICS
28	A	28	TA_GZ	F	62	170	80	27.6817	2021-09-25	2021-09-25	2021-10-01	2021-10-08	2021-10-15	2021-10-15
29	A	29	DA_KA	F	68	165	75	27.5482	2021-09-29	2021-09-29	2021-10-05	dropout	dropout	dropout	2021-10-12	FOLLOW-UP REFUSE
30	B	30	GI_GE	M	51	175	72	23.5102	2021-09-30	2021-09-30	2021-10-06	2021-10-13	2021-10-20	2021-10-20										Confidence 90%
31	B	31	NU_AB	F	63	167	62	22.231	2021-10-05	2021-10-05	2021-10-11	2021-10-18	2021-10-25	2021-10-25
32	B	32	MI_AB	M	37	177	88	28.089	2021-10-05	2021-10-05	2021-10-11	dropout	dropout	dropout	2021-10-18	FOLLOW-UP REFUSE
33	B	33	NI_GE	M	19	180	88	27.1605	2021-10-05	2021-10-05	2021-10-11	2021-10-18	2021-10-25	2021-10-25
34	B	34	NI_GV	M	20	173	68	22.7204	2021-10-12	2021-10-12	2021-10-18	2021-10-25	2021-11-01	2021-11-01
35	B	35	EL_KA	F	54	170	77	26.6436	2021-10-18	2021-10-18	dropout	dropout	dropout	dropout	2021-10-19	VOLUNTARY REFUSE
36	A	36	BE_KE	M	64	177	88	28.089	2021-10-19	2021-10-19	2021-10-25	2021-11-01	2021-11-08	2021-11-08
37	B	37	IN_GR	F	36	165	58	21.3039	2021-10-19	2021-10-19	2021-10-25	2021-11-01	2021-11-08	2021-11-08
38	A	38	GI_CH	M	45	174	78	25.763	2021-10-20	2021-10-20	2021-10-26	2021-11-02	2021-11-09	2021-11-09
39	A	39	LE_TA	M	20	172	80	27.0416	2021-10-20	2021-10-20	2021-10-26	2021-11-02	2021-11-09	2021-11-09
40	A	40	FI_KH	F	62	170	85	29.4118	2021-10-21	2021-10-21	2021-10-27	dropout	dropout	dropout	2021-10-29	USING STEROIDS
41	B	41	TA_SH	F	38	165	88	32.3232	2021-10-27	2021-10-27	dropout	dropout	dropout	dropout	2021-10-29	VOLUNTARY REFUSE
42	B	42	SO_TO	F	42	170	68	23.5294	2021-11-01	2021-11-01	2021-11-07	2021-11-14	2021-11-21	2021-11-21
43	B	43	IR_JA	M	42	177	80	25.5354	2021-11-02	2021-11-02	2021-11-08	2021-11-15	2021-11-22	2021-11-22
44	B	44	IA_MA	M	42	178	70	22.0932	2021-11-08	2021-11-08	2021-11-14	dropout	dropout	dropout	2021-11-21	FOLLOW-UP REFUSE
45	B	45	KE_RI	F	68	166	68	24.677	2021-11-12	2021-11-12	2021-11-18	2021-11-25	2021-12-02	2021-12-02
46	B	46	MU_AB	M	65	175	85	27.7551	2021-11-19	2021-11-19	2021-11-25	2021-12-02	2021-12-08	2021-12-08
47	A	47	RO_AB	F	67	168	89	31.5334	2021-11-19	2021-11-19	2021-11-25	2021-12-02	2021-12-08	2021-12-08
48	B	48	GI_SO	M	33	175	81	26.449	2021-11-29	2021-11-29	2021-12-05	2021-12-12	2021-12-19	2021-12-19
49	B	49	LI_ZA	F	39	178	92	29.0367	2021-12-01	2021-12-01	2021-12-07	2021-12-14	2021-12-21	2021-12-21
50	B	50	NA_RO	F	78	170	68	23.5294	2021-12-02	2021-12-02	2021-12-08	dropout	dropout	dropout	2021-12-15	FOLLOW-UP REFUSE
51	B	51	NI_BR	F	62	165	88	32.3232	2021-12-02	2021-12-02	dropout	dropout	dropout	dropout	2021-12-05	USING STEROIDS
52	B	52	IA_KU	M	82	170	68	23.5294	2021-12-02	2021-12-02	dropout	dropout	dropout	dropout	2021-12-05	USING STEROIDS
53	B	53	MZ_SI	F	80	165	73	26.8136	2021-12-02	2021-12-02	dropout	dropout	dropout	dropout	2021-12-05	USING STEROIDS
54	B	54	AM_KE	M	54	180	78	24.0741	2021-12-02	2021-12-02	dropout	dropout	dropout	dropout	2021-12-05	USING STEROIDS
55	B	55	ZA_KU	M	56	170	67	23.1834	2021-12-03	2021-12-03	2021-12-09	2021-12-16	2021-12-23	2021-12-23
56	A	56	DE_CH	M	42	174	87	28.7356	2021-12-03	2021-12-03	2021-12-09	dropout	dropout	dropout	2021-12-16	FOLLOW-UP REFUSE
57	B	57	DA_KV	M	21	171	72	24.623	2021-12-03	2021-12-03	2021-12-09	dropout	dropout	dropout	2021-12-16	FOLLOW-UP REFUSE
58	A	58	NI_NI	F	41	169	68	23.8087	2021-12-06	2021-12-06	2021-12-12	2021-12-19	2021-12-26	2021-12-26
59	A	59	IL_ME	M	54	181	82	25.0298	2021-12-13	2021-12-13	2021-12-19	2021-12-26	2022-01-02	2022-01-02
60	B	60	DA_GO	M	27	176	78	25.1808	2021-12-13	2021-12-13	2021-12-19	2021-12-26	2022-01-02	2022-01-02
61	A	61	TA_RE	F	59	178	72	22.7244	2021-12-17	2021-12-17	2021-12-23	2021-12-30	2022-01-06	2022-01-06					32		3
62	B	62	EK_GE	F	45	170	68	23.5294	2021-12-20	2021-12-20	2021-12-26	2022-01-02	2022-01-09	2022-01-09
63	A	63	BE_VA	M	66	170	85	29.4118	2021-12-21	2021-12-21	2021-12-27	2022-01-03	2022-01-10	2022-01-10
64	B	64	MA_CH	F	46	175	78	25.4694	2021-12-21	2021-12-21	2021-12-27	2022-01-03	2022-01-10	2022-01-10		FOLLOW-UP REFUSE
65	B	65	GI_UG	M	35	170	80	27.6817	2021-12-24	2021-12-24	2021-12-30	dropout	dropout	dropout	2022-01-06
66	B	66	IN_SU	F	45	170	65	22.4913	2022-01-20	2022-01-20	2022-01-26	2022-02-02	2022-02-09	2022-02-09
67	B	67	TA_KA	F	26	166	56	20.3223	2022-01-22	2022-01-22	2022-01-28	2022-02-04	2022-02-11	2022-02-11
68	B	68	TE_MO	M	67	175	85	27.7551	2022-01-26	2022-01-26	2022-02-01	2022-02-08	2022-02-15	2022-02-15
69	A	69	TE_SI	M	70	175	70	22.8571	2022-01-27	2022-01-27	2022-02-02	2022-02-09	2022-02-16	2022-02-16
70	B	70	TA_BA	F	44	168	70	24.8016	2022-01-28	2022-01-28	2022-02-03	2022-02-10	2022-02-17	2022-02-17
71	B	71	DE_SI	F	23	168	50	17.7154	2022-01-31	2022-01-31	2022-02-06	dropout	dropout	dropout	2022-02-07	FOLLOW-UP REFUSE
72	B	72	NA_NA	F	51	175	70	22.8571	2022-01-31	2022-01-31	2022-02-06	dropout	dropout	dropout	2022-02-07	FOLLOW-UP REFUSE
73	A	73	MA_KA	F	30	165	60	22.0386	2022-01-31	2022-01-31	2022-02-06	2022-02-13	2022-02-20	2022-02-20
74	A	74	NI_BA	F	31	175	73	23.8367	2022-01-31	2022-01-31	2022-02-06	2022-02-13	2022-02-20	2022-02-20
75	B	75	TE_GE	F	33	168	53	18.7783	2022-02-04	2022-02-04	2022-02-10	dropout	dropout	dropout	2022-02-12	FOLLOW-UP REFUSE
76	A	76	NA_KA	F	66	164	64	23.7954	2022-02-09	2022-02-09	2022-02-15	2022-02-22	2022-03-01	2022-03-01
77	A	77	TA_BU	F	27	173	68	22.7204	2022-02-09	2022-02-09	2022-02-15	2022-02-22	2022-03-01	2022-03-01
78	A	78	NA_ZA	F	63	170	60	20.7612	2022-02-09	2022-02-09	2022-02-15	2022-02-22	2022-03-01	2022-03-01
79	A	79	AN_AL	M	42	168	60	21.2585	2022-02-19	2022-02-19	dropout	dropout	dropout	dropout	2022-02-25	FOLLOW-UP REFUSE
80	A	80	MA_AS	F	40	175	88	28.7347	2022-02-19	2022-02-19	2022-02-25	2022-03-04	2022-03-11	2022-03-11
81	B	81	TI_LO	F	47	170	80	27.6817	2022-02-21	2022-02-21	2022-02-27	2022-03-06	2022-03-13	2022-03-13
82	B	82	LI_LO	F	60	171	68	23.255	2022-02-22	2022-02-22	2022-02-28	2022-03-07	2022-03-14	2022-03-14
83	A	83	LI_KA	F	38	166	60	21.7738	2022-02-23	2022-02-23	2022-03-01	2022-03-08	2022-03-15	2022-03-15
84	A	84	SH_VA	M	31	178	74	23.3556	2022-02-24	2022-02-24	2022-03-02	2022-03-09	2022-03-16	2022-03-16
85	B	85	NI_VA	F	41	167	64	22.9481	2022-03-01	2022-03-01	2022-03-07	2022-03-14	2022-03-21	2022-03-21
86	A	86	SH_PO	F	43	168	58	20.5499	2022-03-30	2022-03-30	2022-04-05	2022-04-12	2022-04-19	2022-04-19
87	A	87	xxxxx
88	B	88	xxxxx
89	A	89	xxxxx
90	A	90	xxxxx
91	A	91	xxxxx								Comparison of Survival Curves
92	B	92	xxxxx
93	A	93	xxxxx								Log-rank (Mantel-Cox) test
94	A	94	xxxxx								Chi square	2.092
95	A	95	xxxxx								df	1
96	B	96	xxxxx								P value	0.1481
97	A	97	xxxxx								P value summary	ns
98	A	98	xxxxx								Are the survival curves sig different?	No
99	A	99	xxxxx
100	A	100	xxxxx								Gehan-Breslow-Wilcoxon test
101	A	101	xxxxx								Chi square	2.651
102	A	102	xxxxx								df	1
103	B	103	xxxxx								P value	0.1035
104	A	104	xxxxx								P value summary	ns
105	B	105	xxxxx								Are the survival curves sig different?	No
106	B	106	xxxxx
107	B	107	xxxxx								Median survival
108	B	108	xxxxx								Kan Jang, n=34	Undefined
109	B	109	xxxxx								Placebo, n=52	Undefined
110	B	110	xxxxx
111	A	111	xxxxx								Hazard Ratio (Mantel-Haenszel)	A/B	B/A
112	B	112	xxxxx								Ratio (and its reciprocal)	0.4234	2.362
113	B	113	xxxxx								95% CI of ratio	0.1321 to 1.357	0.7369 to 7.571
114	A	114	xxxxx
115	B	115	xxxxx								Hazard Ratio (logrank)	A/B	B/A
116	A	116	xxxxx								Ratio (and its reciprocal)	0.4178	2.394
117	A	117	xxxxx								95% CI of ratio	0.1406 to 1.275	0.7846 to 7.111
118	B	118	xxxxx
119	B	119	xxxxx
120	B	120	xxxxx
121	A	121	xxxxx
122	B	122	xxxxx
123	A	123	xxxxx
124	A	124	xxxxx
125	A	125	xxxxx
126	B	126	xxxxx
127	A	127	xxxxx
128	A	128	xxxxx
129	B	129	xxxxx
130	A	130	xxxxx
131	B	131	xxxxx
132	A	132	xxxxx
133	A	133	xxxxx
134	A	134	xxxxx
135	A	135	xxxxx
136	A	136	xxxxx
137	A	137	xxxxx
138	A	138	xxxxx
139	A	139	xxxxx
140	A	140	xxxxx
	A
	A
	B
	B
	A
	B
	A
	A
	A
	A
	A
	A
	A
	A
	B
	B
	A
	B
	B
	B

## Sheet: SARS-cov-2 test
					Day 1	Day 7	Day 14	Day 21	event	Kaplan	event	Kaplan
	Dropout Date	Group	Code		Visit 1	Visit 2	Visit 3	Visit 4
1		A	1	COVID-19 PCR test	1	1	1	0	21	1
2	2021-06-20	A	2	COVID-19 PCR test	1	0	0	NA	7	1
3		A	3	COVID-19 PCR test	1	1	1	0	21	1
4		A	4	COVID-19 PCR test	1	1	0	0	14	1
5		B	5	COVID-19 PCR test	1	1	0	0	14	1
6	2021-06-10	A	6	COVID-19 PCR test	1	NA	NA	NA	7	0
7		B	7	COVID-19 PCR test	1	1	1	NA	21	1
8	2021-06-16	B	8	COVID-19 PCR test	1	1	NA	NA	14	0
9	2021-06-17	B	9	COVID-19 PCR test	1	1	NA	NA	14	0
10	2021-06-16	B	10	COVID-19 PCR test	1	NA	NA	NA	7	0
11	2021-06-18	B	11	COVID-19 PCR test	1	1	NA	NA	14	0
12		B	12	COVID-19 PCR test	1	1	1	0	21	1
13		A	13	COVID-19 PCR test	1	1	0	NA	14	1
14	2021-06-22	B	14	COVID-19 PCR test	1	1	NA	NA	14	0
15	2021-06-22	B	15	COVID-19 PCR test	1	1	NA	NA	14	0
16		B	16	COVID-19 PCR test	1	1	0	0	14	1
17		B	17	COVID-19 PCR test	1	1	1	NA	21	1
18		B	18	COVID-19 PCR test	1	1	0	NA	14	1
19		B	19	COVID-19 PCR test	1	1	1	NA	21	1
20		A	20	COVID-19 PCR test	1	1	0	NA	14	1
21	2021-07-13	A	21	COVID-19 PCR test	1	1	NA	NA	14	0
22		A	22	COVID-19 PCR test	1	1	0	NA	14	1
23		A	23	COVID-19 PCR test	1	1	1	NA	21	1
24		B	24	COVID-19 PCR test	1	1	0	NA	14	1
25	2021-08-25	B	25	COVID-19 PCR test	1	1	NA	NA	14	0
26		B	26	COVID-19 PCR test	1	1	0	NA	14	1
27	2021-09-14	A	27	COVID-19 PCR test	1	1	NA	NA	14	0
28		A	28	COVID-19 PCR test	1	0	NA	NA	7	1
29	2021-10-12	A	29	COVID-19 PCR test	1	1	NA	NA	14	0
30		B	30	COVID-19 PCR test	1	1	0	NA	14	1
31		B	31	COVID-19 PCR test	1	1	1	NA	21	1
32	2021-10-18	B	32	COVID-19 PCR test	1	1	NA	NA	14	0
33		B	33	COVID-19 PCR test	1	1	1	NA	21	1
34		B	34	COVID-19 PCR test	1	1	0	NA	14	1
35	2021-10-19	B	35	COVID-19 PCR test	1	NA	NA	NA	7	0
36		A	36	COVID-19 PCR test	1	1	0	NA	14	1
37		B	37	COVID-19 PCR test	1	1	1	NA	21	1
38		A	38	COVID-19 PCR test	1	1	1	NA	21	1
39		A	39	COVID-19 PCR test	1	1	1	NA	21	1
40	2021-10-29	A	40	COVID-19 PCR test	1	1	NA	NA	14	0
41	2021-10-29	B	41	COVID-19 PCR test	1	NA	NA	NA	7	0
42		B	42	COVID-19 PCR test	1	1	0	NA	14	1
43		B	43	COVID-19 PCR test	1	1	1	NA	21	1
44	2021-11-21	B	44	COVID-19 PCR test	1	1	NA	NA	14	0
45		B	45	COVID-19 PCR test	1	1	0	NA	14	1
46		B	46	COVID-19 PCR test	1	1	0	NA	14	1
47		A	47	COVID-19 PCR test	1	1	0	NA	14	1
48		B	48	COVID-19 PCR test	1	1	0	NA	14	1
49		B	49	COVID-19 PCR test	1	1	0	NA	14	1
50	2021-12-15	B	50	COVID-19 PCR test	1	1	NA	NA	14	0
51	2021-12-05	B	51	COVID-19 PCR test	1	NA	NA	NA	7	0
52	2021-12-05	B	52	COVID-19 PCR test	1	NA	NA	NA	7	0
53	2021-12-05	B	53	COVID-19 PCR test	1	NA	NA	NA	7	0
54	2021-12-05	B	54	COVID-19 PCR test	1	NA	NA	NA	7	0
55		B	55	COVID-19 PCR test	1	1	1	NA	21	1
56	2021-12-16	A	56	COVID-19 PCR test	1	1	NA	NA	14	0
57	2021-12-16	B	57	COVID-19 PCR test	1	1	NA	NA	14	0
58		A	58	COVID-19 PCR test	1	1	0	NA	14	1
59		A	59	COVID-19 PCR test	1	1	1	NA	21	1
60		B	60	COVID-19 PCR test	1	1	0	NA	14	1
61		A	61	COVID-19 PCR test	1	1	0	NA	14	1
62		B	62	COVID-19 PCR test	1	1	0	NA	14	1
63		A	63	COVID-19 PCR test	1	1	0	NA	14	1
64		B	64	COVID-19 PCR test	1	1	0	NA	14	1
65	2022-01-06	B	65	COVID-19 PCR test	1	1	NA	NA	14	0
66		B	66	COVID-19 PCR test	1	0	NA	NA	7	1
67		B	67	COVID-19 PCR test	1	0	NA	NA	7	1
68		B	68	COVID-19 PCR test	1	0	NA	NA	7	1
69		A	69	COVID-19 PCR test	1	0	NA	NA	7	1
70		B	70	COVID-19 PCR test	1	0	NA	NA	7	1
71	2022-02-07	B	71	COVID-19 PCR test	1	0	NA	NA	7	0
72	2022-02-07	B	72	COVID-19 PCR test	1	0	NA	NA	7	0
73		A	73	COVID-19 PCR test	1	0	NA	NA	7	1
74		A	74	COVID-19 PCR test	1	0	NA	NA	7	1
75	2022-02-12	B	75	COVID-19 PCR test	1	0	NA	NA	7	0
76		A	76	COVID-19 PCR test	1	0	NA	NA	7	1
77		A	77	COVID-19 PCR test	1	0	NA	NA	7	1
78		A	78	COVID-19 PCR test	1	0	NA	NA	7	1
79	2022-02-25	A	79	COVID-19 PCR test	1	NA	NA	NA	7	0
80		A	80	COVID-19 PCR test	1	1	0	NA	14	1
81		B	81	COVID-19 PCR test	1	0	0	NA	7	1
82		B	82	COVID-19 PCR test	1	1	0	NA	14	1
83		A	83	COVID-19 PCR test	1	1	0	NA	14	1
84		A	84	COVID-19 PCR test	1	1	0	NA	14	1
85		B	85	COVID-19 PCR test	1	1	0	NA	14	1
86		A	86	COVID-19 PCR test	1	1	0	NA	14	1
		A	87	COVID-19 PCR test
		B	88	COVID-19 PCR test
		A	89	COVID-19 PCR test
		A	90	COVID-19 PCR test
		A	91	COVID-19 PCR test
		B	92	COVID-19 PCR test
		A	93	COVID-19 PCR test
		A	94	COVID-19 PCR test
		A	95	COVID-19 PCR test
		B	96	COVID-19 PCR test
		A	97	COVID-19 PCR test
		A	98	COVID-19 PCR test
		A	99	COVID-19 PCR test
		A	100	COVID-19 PCR test
		A	101	COVID-19 PCR test
		A	102	COVID-19 PCR test
		B	103	COVID-19 PCR test
		A	104	COVID-19 PCR test
		B	105	COVID-19 PCR test
		B	106	COVID-19 PCR test
		B	107	COVID-19 PCR test
		B	108	COVID-19 PCR test
		B	109	COVID-19 PCR test
		B	110	COVID-19 PCR test
		A	111	COVID-19 PCR test
		B	112	COVID-19 PCR test
		B	113	COVID-19 PCR test
		A	114	COVID-19 PCR test
		B	115	COVID-19 PCR test
		A	116	COVID-19 PCR test
		A	117	COVID-19 PCR test
		B	118	COVID-19 PCR test
		B	119	COVID-19 PCR test
		B	120	COVID-19 PCR test
		A	121	COVID-19 PCR test
		B	122	COVID-19 PCR test
		A	123	COVID-19 PCR test
		A	124	COVID-19 PCR test
		A	125	COVID-19 PCR test
		B	126	COVID-19 PCR test
		A	127	COVID-19 PCR test
		A	128	COVID-19 PCR test
		B	129	COVID-19 PCR test
		A	130	COVID-19 PCR test
		B	131	COVID-19 PCR test
		A	132	COVID-19 PCR test
		A	133	COVID-19 PCR test
		A	134	COVID-19 PCR test
		A	135	COVID-19 PCR test
		A	136	COVID-19 PCR test
		A	137	COVID-19 PCR test
		A	138	COVID-19 PCR test
		A	139	COVID-19 PCR test
		A	140	COVID-19 PCR test
		A	141
		A	142
		B	143
		B	144
		A	145
		B	146
		A	147
		A	148
		A	149
		A	150
		A	151
		A	152
		A	153
		A	154
		B	155
		B	156
		A	157
		B	158
		B	159
		B	160
			Kan Jng, n=27	7
			Placebo, n=32	14
			Ratio (and its reciprocal)	0.5	2
			95% CI of ratio	0.2996 to 0.8345	1.198 to 3.338
